# Supplementary material
Source: publisher figshare collection journal article supplement (https://acs.figshare.com/ndownloader/files/4580827)
Supplement: Supplementary file 1 [file 4580827]

### **Supporting information available**

This section contains the following items:

Figure S1. Determination of the amount of GSLs captured on aoGNP by HPAE-PAD method

Table S1. Amount of GSLs blotted on GCNP determined by HPAE-PAD analysis

**Figure S1. Determination of the amount of GSLs captured on aoGNP by**

**HPAE-PAD method**

(experimental details are described in the main text “experimental section”)

Left, calibration curves for each GSLs (x axis, concentration of GSLs; y axis, peak area).

The differences between a (wash, filtrate after GSLs-enrichment on GNP) and b (apply, GSLs before subjecting glycoblotting) indicates the amount of GSLs enriched on GNP.

Right, analyzed profile at the time point a (wash) and b (apply)

Running buffer; 100 mM NaOH aq. 1 mL/min

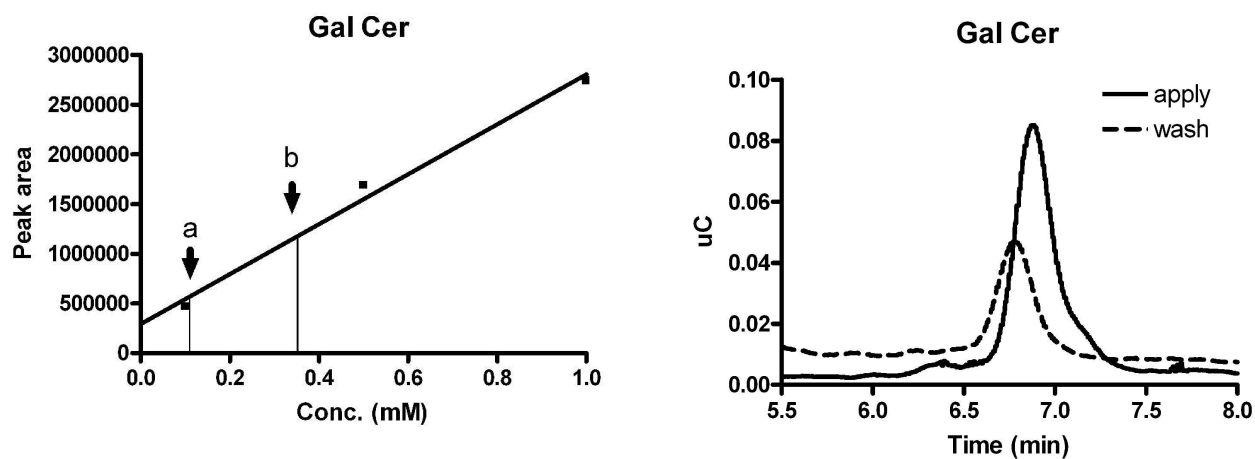

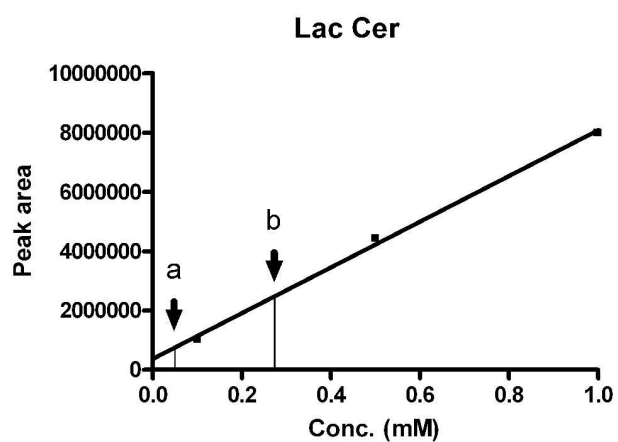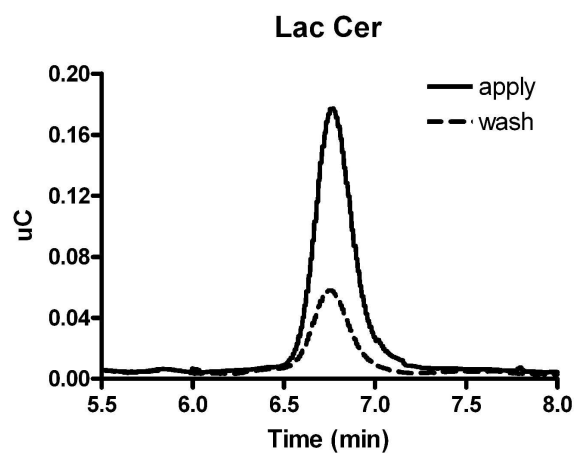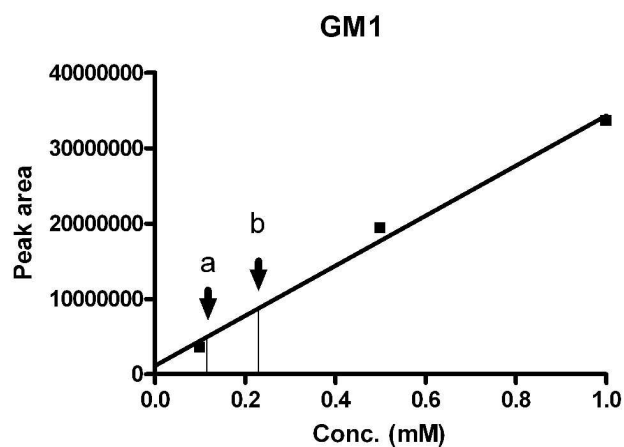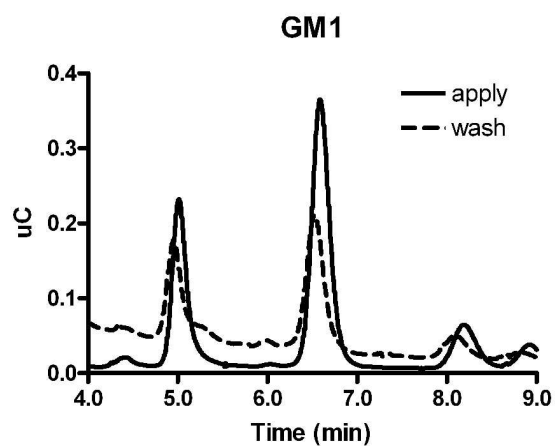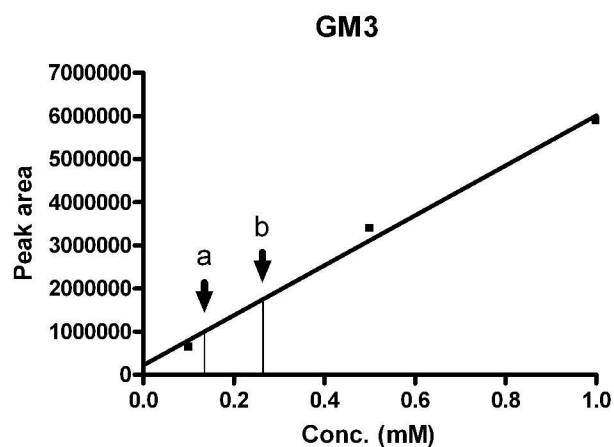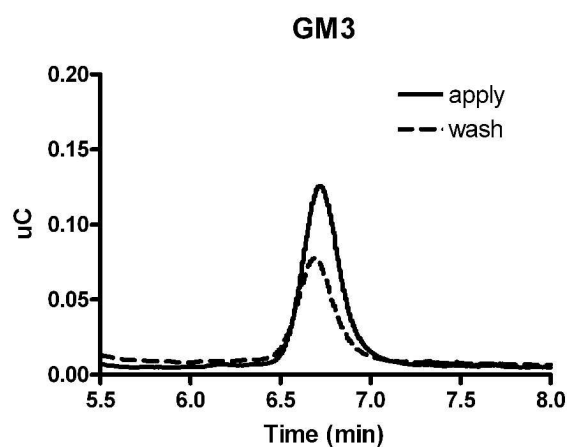

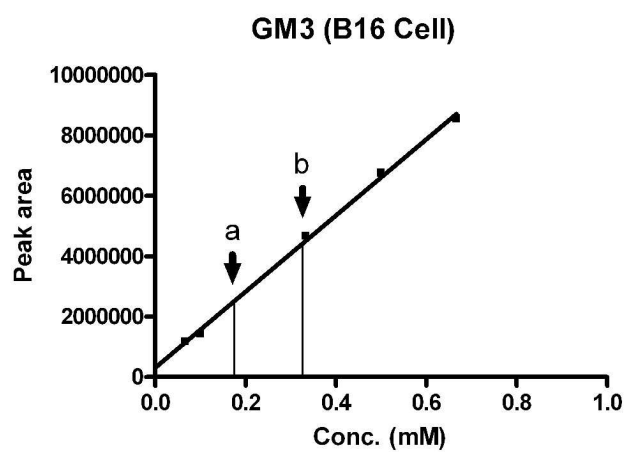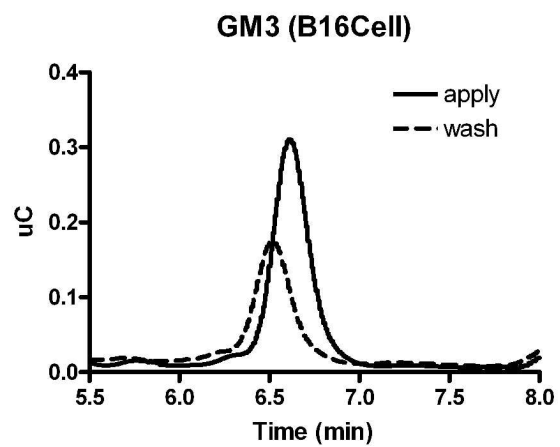

**Table S1. Amount of GSLs blotted on GCNP determined by HPAE-PAD analysis**

|                              | GSLs from B16<br>cell | GM3       | GalCer    | LacCer    | GM1       |
|------------------------------|-----------------------|-----------|-----------|-----------|-----------|
| detected                     | 7.55 nmol             | 6.50 nmol | 12.5 nmol | 11.5 nmol | 5.74 nmol |
| Yield of the<br>reaction (%) | 51                    | 44        | 84        | 75        | 39        |

.the yield is calculated based on the aminooxyl functional group dispalyed on GNP.
